# Supplementary material for: Correction of moisture interference in laser-induced breakdown spectroscopy detection of coal by combining neural networks and random spectral attenuation
Source: Royal Society of Chemistry journal article supplement (doi:10.1039/d2ja00138a), 2022-01-01
Supplement: d2ja00138a1.pdf [file d2ja00138a1.pdf]

**S1.** Reference values of volatile matter content of training set (numbered as Tr) and test set (numbered as Te)

| Sample number | Reference Vad (%) | Sample number | Reference Vad (%) |
|---------------|-------------------|---------------|-------------------|
| Tr-1          | 8.08              | Tr-2          | 8.16              |
| Tr-3          | 8.16              | Tr-4          | 8.16              |
| Tr-5          | 8.26              | Tr-6          | 8.3               |
| Tr-7          | 8.32              | Tr-8          | 8.38              |
| Tr-9          | 8.44              | Tr-10         | 8.45              |
| Tr-11         | 8.5               | Tr-12         | 8.55              |
| Tr-13         | 8.61              | Tr-14         | 8.61              |
| Tr-15         | 8.62              | Tr-16         | 8.65              |
| Tr-17         | 8.66              | Tr-18         | 8.7               |
| Tr-19         | 8.71              | Tr-20         | 8.77              |
| Tr-21         | 8.85              | Tr-22         | 8.86              |
| Tr-23         | 8.88              | Tr-24         | 8.9               |
| Tr-25         | 8.92              | Tr-26         | 8.96              |
| Tr-27         | 8.97              | Tr-28         | 8.97              |
| Tr-29         | 9                 | Tr-30         | 9.03              |
| Tr-31         | 9.04              | Tr-32         | 9.08              |
| Tr-33         | 9.14              | Tr-34         | 9.14              |
| Tr-35         | 9.14              | Tr-36         | 9.24              |
| Tr-37         | 9.36              | Tr-38         | 9.42              |
| Tr-39         | 9.48              | Tr-40         | 9.51              |
| Tr-41         | 9.58              | Tr-42         | 9.59              |
| Tr-43         | 9.63              | Tr-44         | 9.7               |
| Tr-45         | 9.8               | Tr-46         | 9.89              |
| Tr-47         | 9.96              | Tr-48         | 10.07             |
| Tr-49         | 10.23             | Tr-50         | 10.53             |
| Tr-51         | 10.56             | Tr-52         | 10.92             |
| Te-1          | 7.61              | Te-2          | 8.23              |
| Te-3          | 8.38              | Te-4          | 8.55              |
| Te-5          | 8.65              | Te-6          | 8.78              |
| Te-7          | 8.91              | Te-8          | 8.98              |
| Te-9          | 9.12              | Te-10         | 9.29              |
| Te-11         | 9.55              | Te-12         | 9.77              |
| Te-13         | 10.09             | Te-14         | 11.39             |

**S2.** The internal water content of training set (numbered as Tr) and test set (numbered as Te)

| Sample number | Internal water content (%) | Sample number | Internal water content (%) |
|---------------|----------------------------|---------------|----------------------------|
| Tr-1          | 0.94                       | Tr-2          | 0.82                       |
| Tr-3          | 0.77                       | Tr-4          | 0.98                       |
| Tr-5          | 1.02                       | Tr-6          | 1.44                       |
| Tr-7          | 0.93                       | Tr-8          | 1.14                       |
| Tr-9          | 0.93                       | Tr-10         | 0.87                       |
| Tr-11         | 0.96                       | Tr-12         | 0.79                       |
| Tr-13         | 1.15                       | Tr-14         | 1.34                       |
| Tr-15         | 0.64                       | Tr-16         | 0.86                       |
| Tr-17         | 0.90                       | Tr-18         | 0.89                       |
| Tr-19         | 0.90                       | Tr-20         | 1.08                       |
| Tr-21         | 1.06                       | Tr-22         | 0.75                       |
| Tr-23         | 1.30                       | Tr-24         | 1.16                       |
| Tr-25         | 0.70                       | Tr-26         | 1.06                       |
| Tr-27         | 1.09                       | Tr-28         | 0.63                       |
| Tr-29         | 0.89                       | Tr-30         | 0.72                       |
| Tr-31         | 0.86                       | Tr-32         | 0.95                       |
| Tr-33         | 0.86                       | Tr-34         | 0.88                       |
| Tr-35         | 0.74                       | Tr-36         | 1.20                       |
| Tr-37         | 0.90                       | Tr-38         | 0.98                       |
| Tr-39         | 0.96                       | Tr-40         | 0.82                       |
| Tr-41         | 1.02                       | Tr-42         | 1.01                       |
| Tr-43         | 1.54                       | Tr-44         | 1.14                       |
| Tr-45         | 1.08                       | Tr-46         | 0.96                       |
| Tr-47         | 1.06                       | Tr-48         | 0.83                       |
| Tr-49         | 1.03                       | Tr-50         | 0.85                       |
| Tr-51         | 1.00                       | Tr-52         | 0.70                       |
| Te-1          | 0.96                       | Te-2          | 0.95                       |
| Te-3          | 0.84                       | Te-4          | 1.52                       |
| Te-5          | 0.93                       | Te-6          | 0.78                       |
| Te-7          | 0.88                       | Te-8          | 1.00                       |
| Te-9          | 0.84                       | Te-10         | 0.95                       |
| Te-11         | 1.26                       | Te-12         | 1.10                       |
| Te-13         | 0.87                       | Te-14         | 1.22                       |

**S3. Air-dry basis ash (Aad) content of training set (numbered as Tr) and test set (numbered as Te)**

| Sample number | Aad (%) | Sample number | Aad (%) |
|---------------|---------|---------------|---------|
| Tr-1          | 23.53   | Tr-2          | 23.59   |
| Tr-3          | 24.33   | Tr-4          | 22.45   |
| Tr-5          | 21.91   | Tr-6          | 24.21   |
| Tr-7          | 23.29   | Tr-8          | 22.38   |
| Tr-9          | 24.31   | Tr-10         | 23.31   |
| Tr-11         | 26.31   | Tr-12         | 24.73   |
| Tr-13         | 25.03   | Tr-14         | 25.75   |
| Tr-15         | 22.84   | Tr-16         | 23.52   |
| Tr-17         | 26.99   | Tr-18         | 25.61   |
| Tr-19         | 25.61   | Tr-20         | 24.93   |
| Tr-21         | 23.80   | Tr-22         | 25.19   |
| Tr-23         | 26.58   | Tr-24         | 24.64   |
| Tr-25         | 25.02   | Tr-26         | 24.70   |
| Tr-27         | 26.04   | Tr-28         | 22.91   |
| Tr-29         | 24.71   | Tr-30         | 23.39   |
| Tr-31         | 24.92   | Tr-32         | 25.30   |
| Tr-33         | 21.47   | Tr-34         | 25.28   |
| Tr-35         | 26.07   | Tr-36         | 24.78   |
| Tr-37         | 26.65   | Tr-38         | 23.62   |
| Tr-39         | 25.90   | Tr-40         | 25.59   |
| Tr-41         | 24.19   | Tr-42         | 23.47   |
| Tr-43         | 23.89   | Tr-44         | 28.11   |
| Tr-45         | 26.71   | Tr-46         | 28.22   |
| Tr-47         | 25.73   | Tr-48         | 24.63   |
| Tr-49         | 23.65   | Tr-50         | 21.99   |
| Tr-51         | 21.43   | Tr-52         | 24.78   |
| Te-1          | 24.39   | Te-2          | 22.12   |
| Te-3          | 22.80   | Te-4          | 24.38   |
| Te-5          | 32.98   | Te-6          | 27.45   |
| Te-7          | 25.21   | Te-8          | 22.98   |
| Te-9          | 24.47   | Te-10         | 25.53   |
| Te-11         | 25.42   | Te-12         | 23.40   |
| Te-13         | 27.78   | Te-14         | 28.08   |

**S4.** Air-dry basis fixed carbon (FCad) content of training set (numbered as Tr) and test set (numbered as Te)

| Sample number | FCad (%) | Sample number | FCad (%) |
|---------------|----------|---------------|----------|
| Tr-1          | 67.45    | Tr-2          | 67.43    |
| Tr-3          | 66.74    | Tr-4          | 68.41    |
| Tr-5          | 68.81    | Tr-6          | 66.05    |
| Tr-7          | 67.46    | Tr-8          | 68.10    |
| Tr-9          | 66.32    | Tr-10         | 67.37    |
| Tr-11         | 64.23    | Tr-12         | 65.93    |
| Tr-13         | 65.21    | Tr-14         | 64.30    |
| Tr-15         | 67.90    | Tr-16         | 66.97    |
| Tr-17         | 63.45    | Tr-18         | 64.80    |
| Tr-19         | 64.78    | Tr-20         | 65.22    |
| Tr-21         | 66.29    | Tr-22         | 65.20    |
| Tr-23         | 63.24    | Tr-24         | 65.30    |
| Tr-25         | 65.36    | Tr-26         | 65.28    |
| Tr-27         | 63.90    | Tr-28         | 67.49    |
| Tr-29         | 65.40    | Tr-30         | 66.86    |
| Tr-31         | 65.18    | Tr-32         | 64.67    |
| Tr-33         | 68.53    | Tr-34         | 64.70    |
| Tr-35         | 64.05    | Tr-36         | 64.78    |
| Tr-37         | 63.09    | Tr-38         | 65.98    |
| Tr-39         | 63.66    | Tr-40         | 64.08    |
| Tr-41         | 65.21    | Tr-42         | 65.93    |
| Tr-43         | 64.94    | Tr-44         | 61.05    |
| Tr-45         | 62.41    | Tr-46         | 60.93    |
| Tr-47         | 63.25    | Tr-48         | 64.47    |
| Tr-49         | 65.09    | Tr-50         | 66.63    |
| Tr-51         | 67.01    | Tr-52         | 63.60    |
| Te-1          | 67.04    | Te-2          | 68.70    |
| Te-3          | 67.98    | Te-4          | 65.55    |
| Te-5          | 57.44    | Te-6          | 62.99    |
| Te-7          | 65.00    | Te-8          | 67.04    |
| Te-9          | 65.57    | Te-10         | 64.23    |
| Te-11         | 63.77    | Te-12         | 65.73    |
| Te-13         | 61.26    | Te-14         | 59.31    |

**S5. Prediction accuracy using different regularization factor without random spectral attenuation**

| Regularization factor | R <sup>2</sup> C | Humidified test set |               | Routine test set |               |
|-----------------------|------------------|---------------------|---------------|------------------|---------------|
|                       |                  | R <sup>2</sup> P    | RMSEP (%)     | R <sup>2</sup> P | RMSEP (%)     |
| 2 <sup>-10</sup>      | 0.9999           | -125.0913           | 9.9827        | -1.4931          | 1.4037        |
| 2 <sup>-9</sup>       | 0.9999           | -84.4853            | 8.2196        | -2.5707          | 1.6799        |
| 2 <sup>-8</sup>       | 0.9998           | -17.0269            | 3.7746        | -0.8069          | 1.1950        |
| 2 <sup>-7</sup>       | 0.9999           | -111.9000           | 9.4461        | -0.5126          | 1.0934        |
| 2 <sup>-6</sup>       | 0.9999           | -94.1231            | 8.6706        | -2.3725          | 1.6326        |
| 2 <sup>-5</sup>       | 0.9998           | -9.1963             | 2.8388        | -0.0808          | 0.9242        |
| 2 <sup>-4</sup>       | 0.9993           | -15.8961            | 3.6543        | 0.2553           | 0.7672        |
| 2 <sup>-3</sup>       | 0.9990           | -19.0254            | 3.9783        | -0.0415          | 0.9073        |
| 2 <sup>-2</sup>       | 0.9968           | -19.8732            | 4.0616        | 0.1366           | 0.8260        |
| 2 <sup>-1</sup>       | 0.9890           | -5.7663             | 2.3125        | 0.6078           | 0.5567        |
| 1                     | 0.9586           | -3.1446             | 1.8099        | 0.7484           | 0.4459        |
| 2 <sup>1</sup>        | 0.9313           | -0.8138             | 1.1973        | 0.7748           | 0.4219        |
| 2 <sup>2</sup>        | 0.8636           | -0.5532             | 1.1079        | 0.7523           | 0.4425        |
| <b>2<sup>3</sup></b>  | <b>0.7965</b>    | <b>0.3517</b>       | <b>0.7158</b> | <b>0.6862</b>    | <b>0.4980</b> |
| 2 <sup>4</sup>        | 0.6291           | 0.2900              | 0.7491        | 0.4713           | 0.6464        |
| 2 <sup>5</sup>        | 0.2402           | 0.1110              | 0.8382        | 0.1375           | 0.8256        |
| 2 <sup>6</sup>        | 0.0000           | -0.0016             | 0.8897        | -0.0016          | 0.8897        |
| 2 <sup>7</sup>        | 0.0000           | -0.0016             | 0.8897        | -0.0016          | 0.8897        |
| 2 <sup>8</sup>        | 0.0000           | -0.0016             | 0.8897        | -0.0016          | 0.8897        |
| 2 <sup>9</sup>        | 0.0000           | -0.0016             | 0.8897        | -0.0016          | 0.8897        |
| 2 <sup>10</sup>       | 0.0000           | -0.0016             | 0.8897        | -0.0016          | 0.8897        |
